# Supplementary material for: Population Pharmacokinetics and Exposure–Response of Luspatercept, an Erythroid Maturation Agent, in Anemic Patients With Myelodysplastic Syndromes
Source: PubMed Central journal article supplement — CPT Pharmacometrics Syst Pharmacol. 2020 Jun 30;9(7):395–404. doi: 10.1002/psp4.12521 (PMC7376288; doi:10.1002/psp4.12521), 2020-06-30
Supplement: PSP4-9-395-s001.pdf [file PSP4-9-395-s001.pdf]

**Figure S1** Goodness-fit plots for the final population PK model of luspatercept

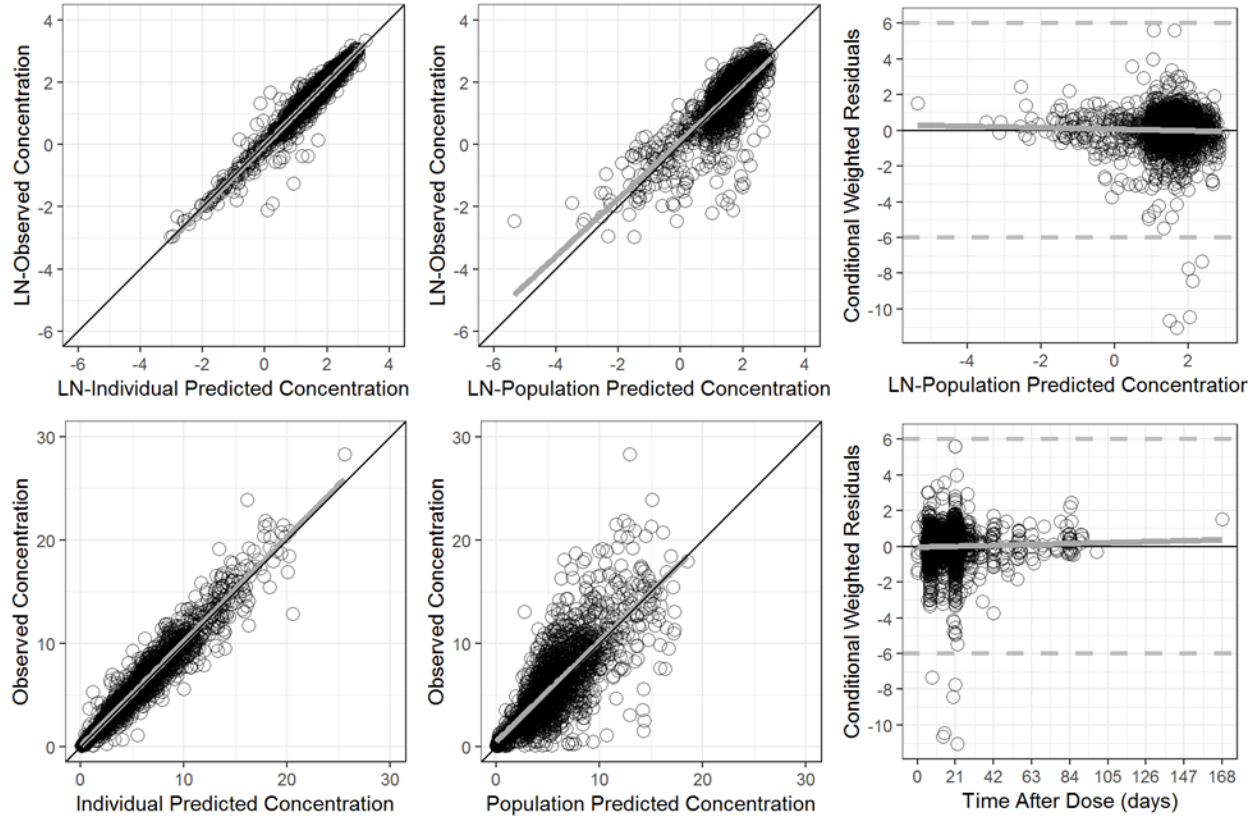

The black line represents the identity line (left and center panels) or zero line (right panel). The gray line represents locally weighted scatterplot smoothing lines. Concentrations are in  $\mu\text{g/mL}$ . LN, natural logarithm; PK, pharmacokinetics.
